# Supplementary material for: Double protein directed synthesis of chemically etched sulfur doped quantum dots for signal “on–off–on” sensing of glutathione mediated by copper ions
Source: Royal Society of Chemistry journal article supplement (doi:10.1039/d3ay00999h), 2023-01-01
Supplement: d3ay00999h1.pdf [file d3ay00999h1.pdf]

## Electronic Supplementary Material

### Double protein directed synthesis of chemically etched sulfur doped quantum dots for signal “on-off-on” sensing of glutathione mediated by copper ion

Ashraf M. Mahmoud<sup>a</sup>, Mater H. Mahnashi<sup>a</sup>, Mohamed M. El-Wakil<sup>\*b</sup>

<sup>a</sup> Department of Pharmaceutical Chemistry, College of Pharmacy, Najran University, Najran, Saudi Arabia

<sup>b</sup> Department of Pharmaceutical Analytical Chemistry, Faculty of Pharmacy, Assiut University, Assiut, Egypt.

\*[mohamed.elwakeel@pharm.aun.edu.eg](mailto:mohamed.elwakeel@pharm.aun.edu.eg), [mohamed.mohamoud@ymail.com](mailto:mohamed.mohamoud@ymail.com) (corresponding author)

## **Instrumentation**

Excitation and emission spectra were measured on Shimadzu RF-5301 PC fluorometer with slit width of 3 nm and 1 cm quartz cuvette. Transmission Electron Microscope (TEM) was used to investigate the morphology of SQ-dots (JEOL JEM-100CX II-unit). FT-IR measurements were carried out on Nicolet™ iS™10 spectrometer. Elemental analysis (EDX) was used to show the elemental composition of SQ-dots using NEX QC+ QuantEZ. The X-ray diffraction spectrometer (XRD) PW 1710 was used to investigate the peak diffraction. Raman spectra were taken on Micro-Raman spectrometer (U.K.). Dynamic light scattering measurements (DLS) were carried out using Zetasizer Red badge instrument of ZEN 3600 Nano ZS model (Malvern, UK). X-ray photoelectron spectrometer (XPS, ESCA Ulvac-PHI 1600, PHI Quantum 2000 XPS system, Physical Electronics, USA) was used to reveal the surface functional groups of SQ-dots.

## Calculation of quantum yield (QY)

The QY of the fluorescent SQ-dots was determined by a relative slope method. Quinine sulfate (QY=54% in 0.1 M H<sub>2</sub>SO<sub>4</sub>) was selected as a standard for the prepared SQ-dots. The aqueous solution of SQ-dots and quinine sulfate were diluted to keep the absorption intensity below 0.1 at the best excitation wavelength of 360. The QY of the prepared SQ-dots was calculated according to the following equation:

$$\varphi_x = \varphi_{st} (K_x/K_{st}) (\eta_x/\eta_{st})^2$$

Where  $\varphi$  is the quantum yield,  $K$  is the slope of the fitted line, and  $\eta$  is the refractive index of the solvent. The subscript “x” refers to the testing sample, and “st” refers to the standards. The value of the refractive index is 1.33 for water.

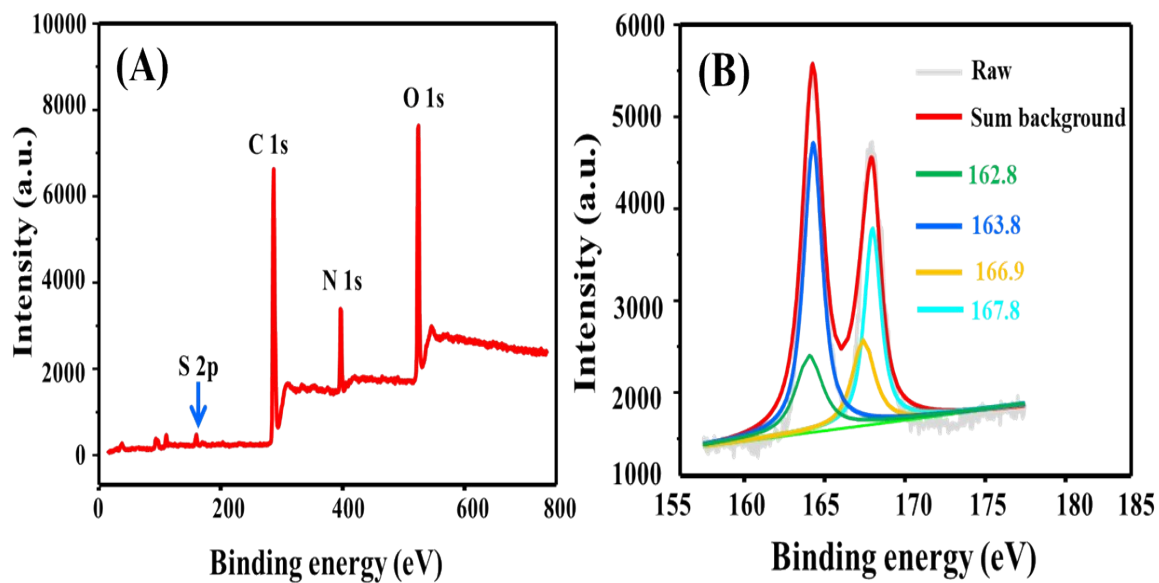

**Fig.S1** The XPS survey (A) and HR-XPS of S 2p of SQ-dots.

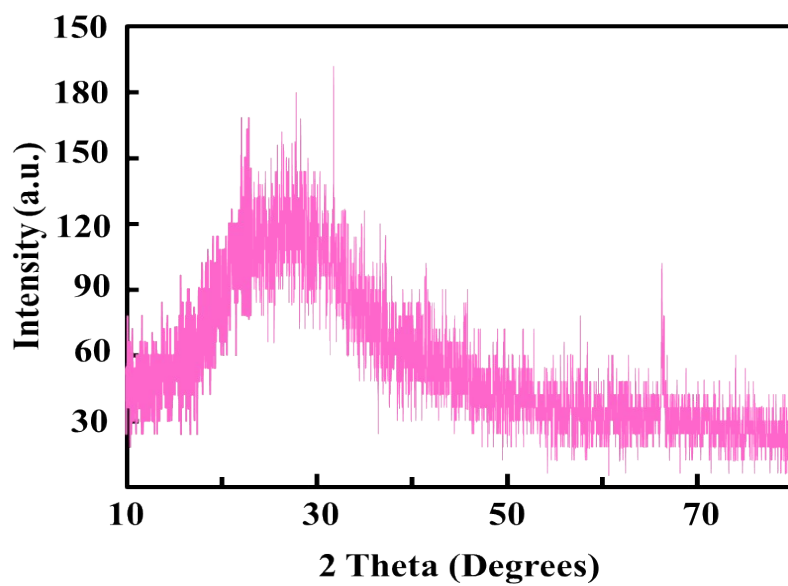

**Fig.S2** The XRD of SQ-dots.

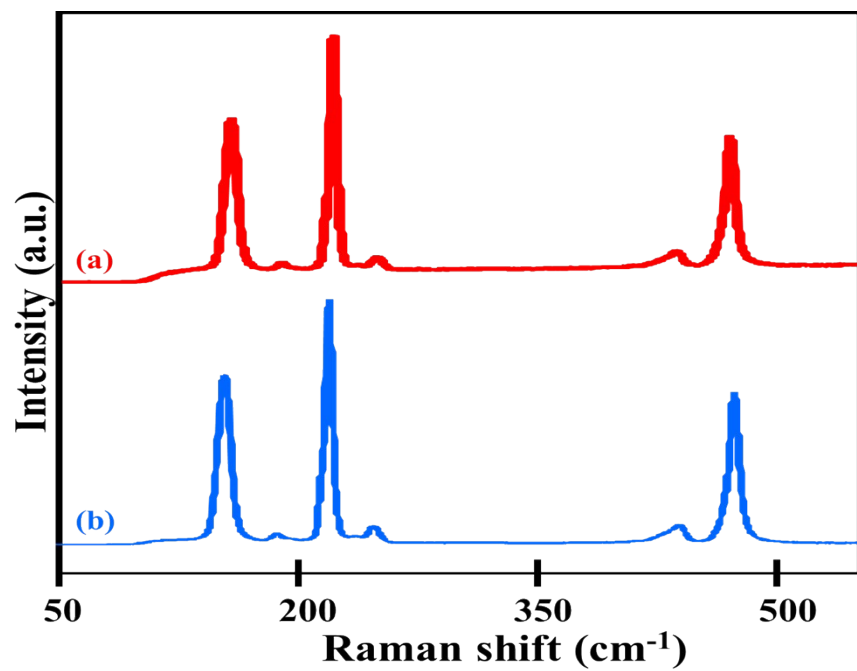

Fig.S3 Raman spectra of (a) elemental sulfur and (b) SQ-dots.

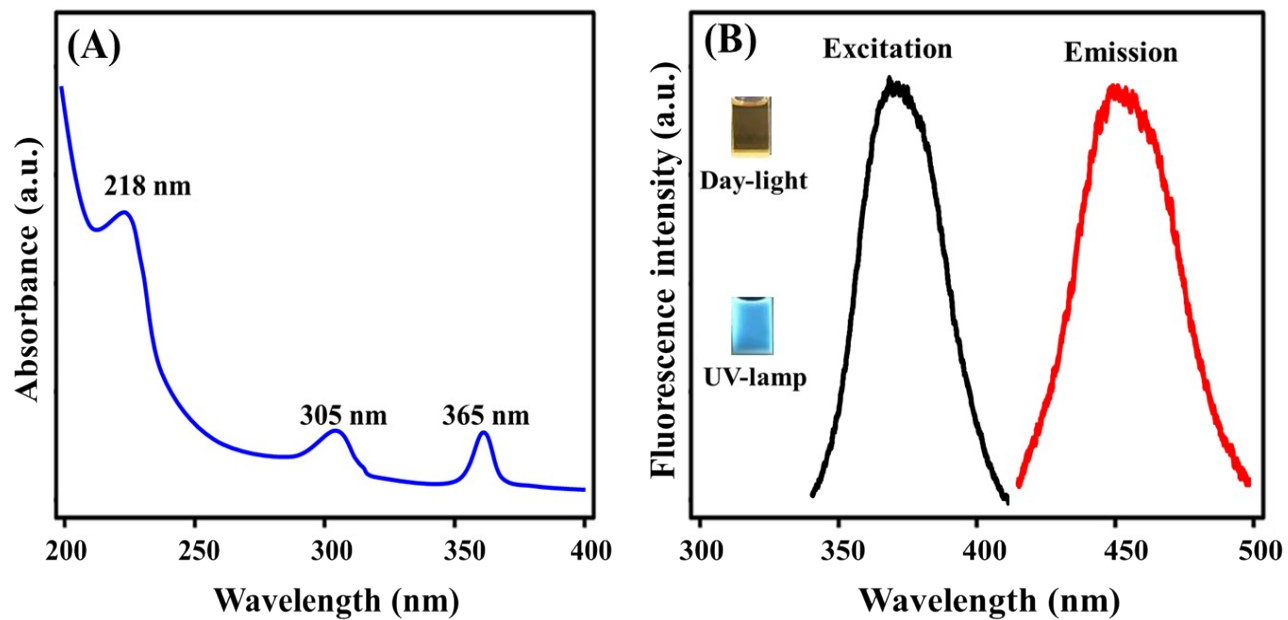

**Fig.S4** (A) UV/VIS absorption spectra and (B) fluorescence spectra of the as-prepared SQ-dots.

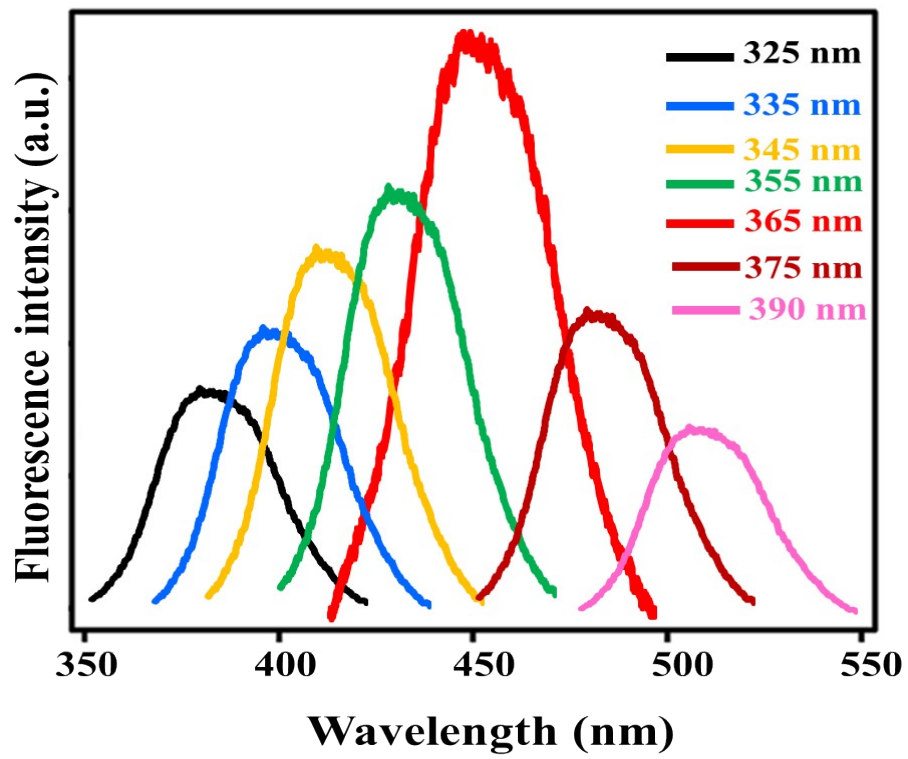

Fig.S5 Dependency of the emission wavelengths on the excitation wavelengths.



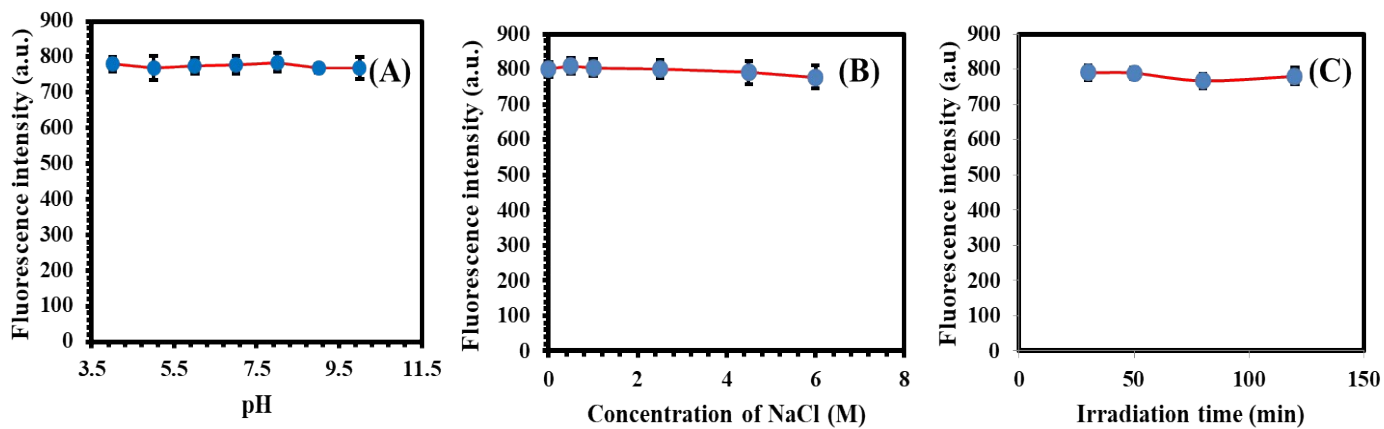

**Fig.S6** Influence of different pH values, ionic strengths, and irradiation times on the stability of SQ-dots.

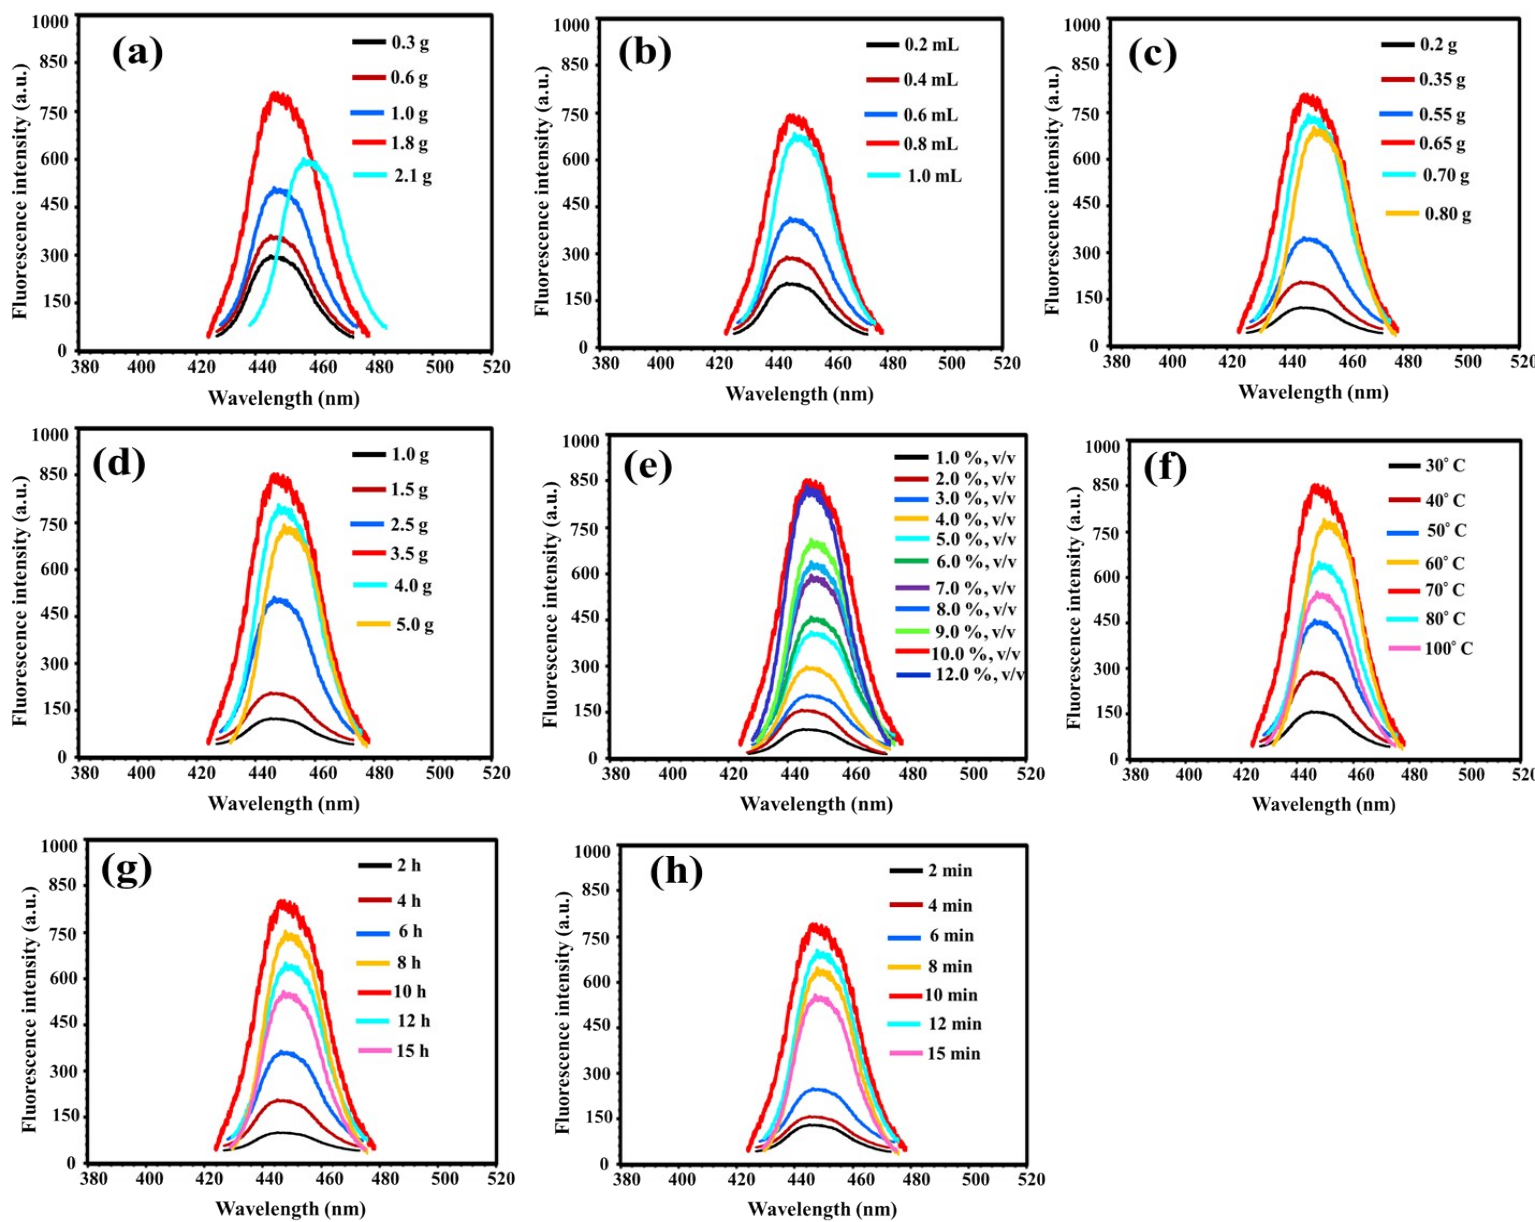

**Fig.S7** The influence of amount of elemental sulfur, volume of egg white, amounts of bovine serum albumin (BSA), amount of sodium hydroxide (NaOH), reaction temperature, synthesis time, concentration of H<sub>2</sub>O<sub>2</sub>, and itching time on the fluorescence intensity of SQ-dots.

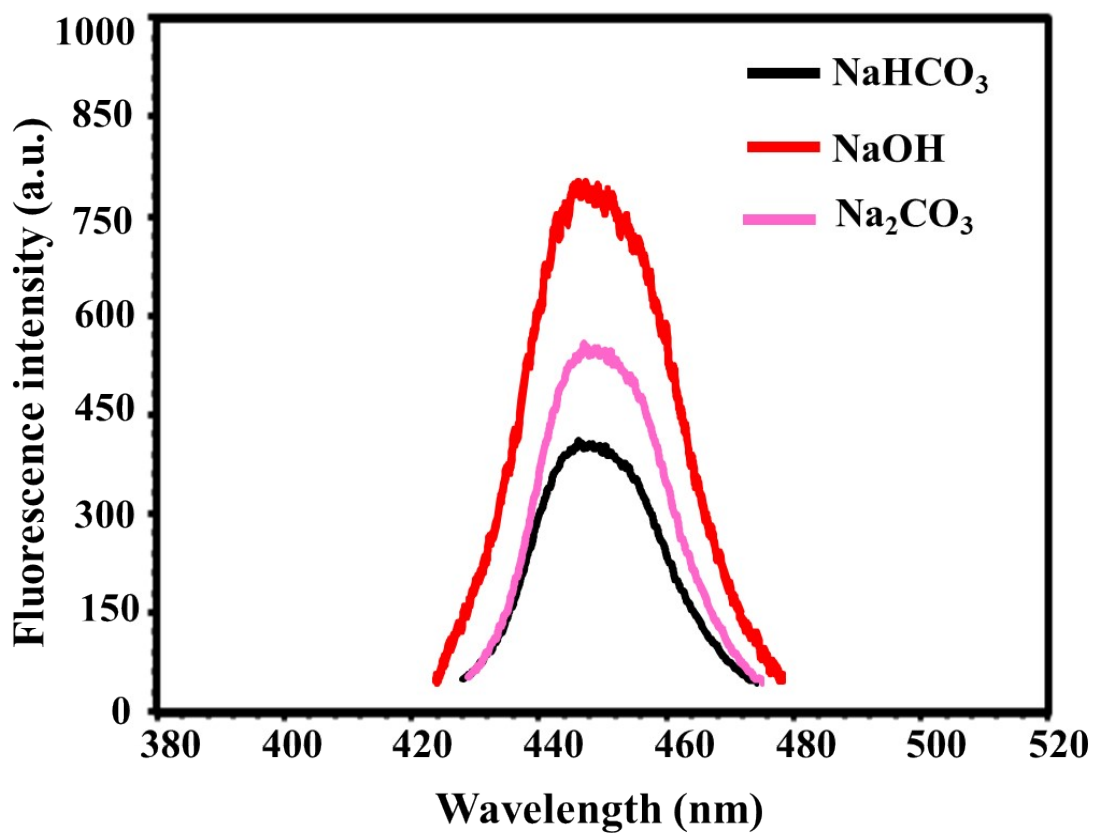

**Fig.S8** The influence of different alkalis (3.5 g for each) on the fluorescence intensity of SQ-dots.

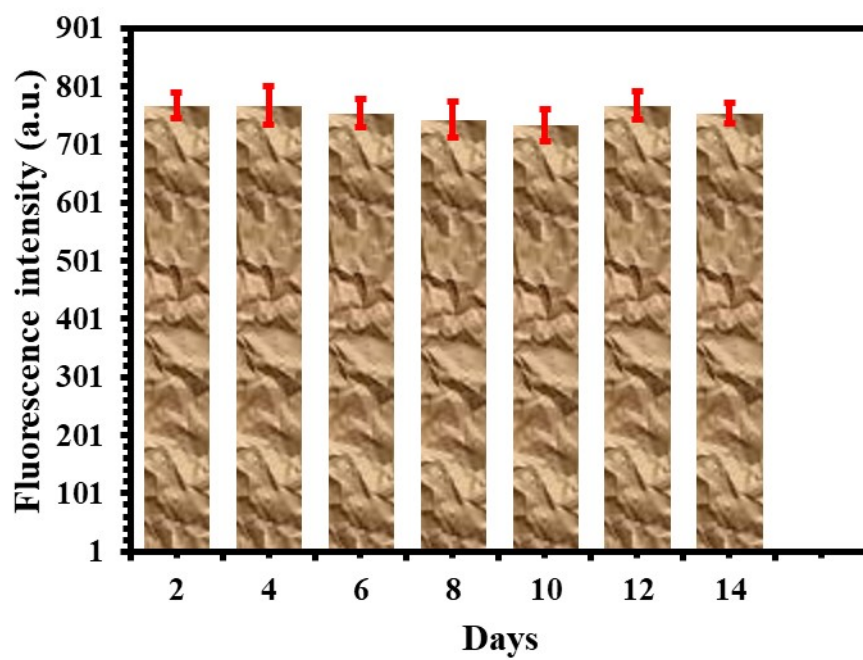

Fig.S9 The fluorescence intensity of SQ-dots incubated at 4°C for 14 days.

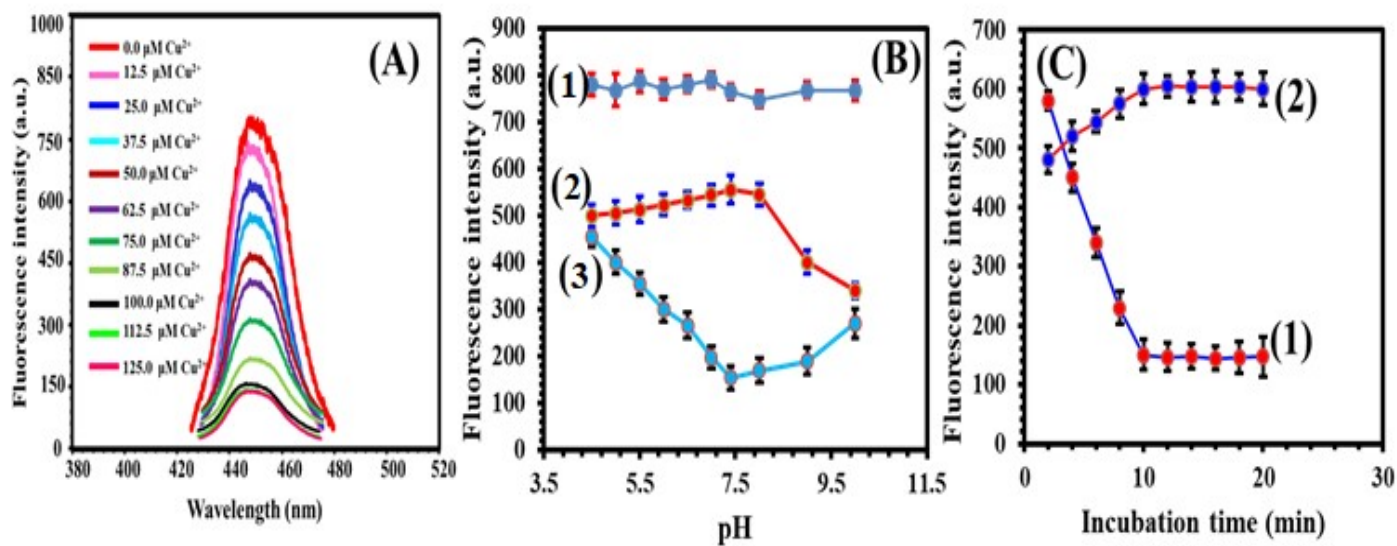

**Fig.S10** Construction of GSH sensing nanoswitch based on SQ-dots/Cu<sup>2+</sup> probe. (A) Fluorescence spectra of the prepared SQ-dots that was incubated with Cu<sup>2+</sup> of different concentrations. (B) The effect of different pH values: (1) SQ-dots; (2) SQ-dots+Cu<sup>2+</sup>; (3) SQ-dots/Cu<sup>2+</sup>+GSH. (C) The effect of incubation time on the fluorescence intensity of: (1) SQ-dots+Cu<sup>2+</sup> and (2) SQ-dots/Cu<sup>2+</sup>+GSH.

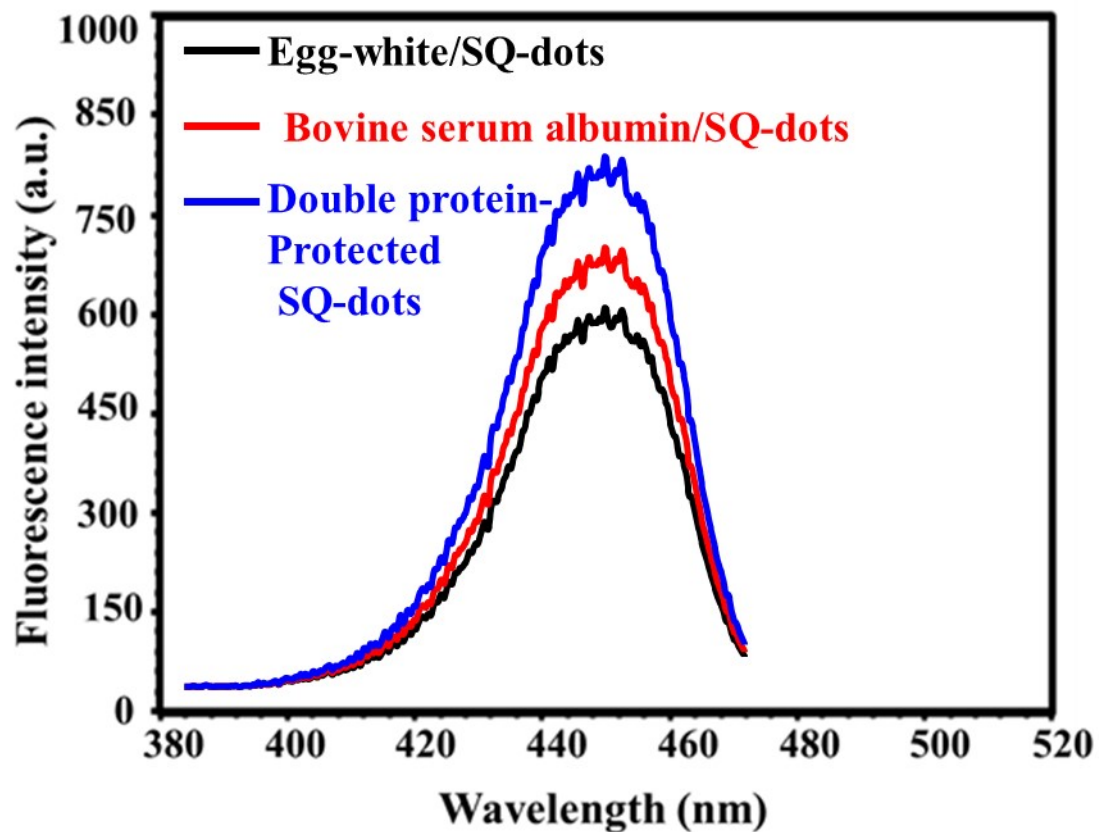

**Fig.S11** Fluorescence spectra of egg-white/SQ-dots, bovine serum albumin/SQ-dots, and egg-white/bovine serum albumin protected SQ-dots (double-protein-protected SQ-dots).

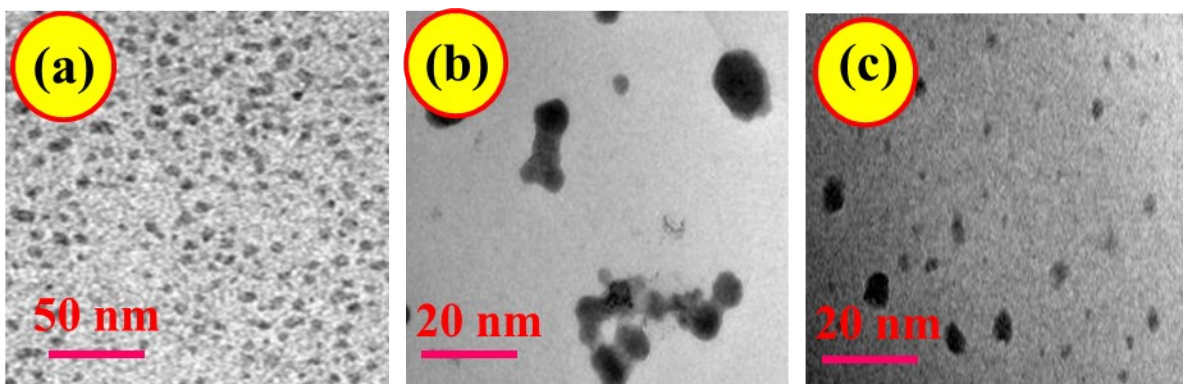

**Fig.S12** TEM images of (a) SQ-dots; (b) SQ-dots+Cu<sup>2+</sup>; (c) SQ-dots/Cu<sup>2+</sup>+GSH.

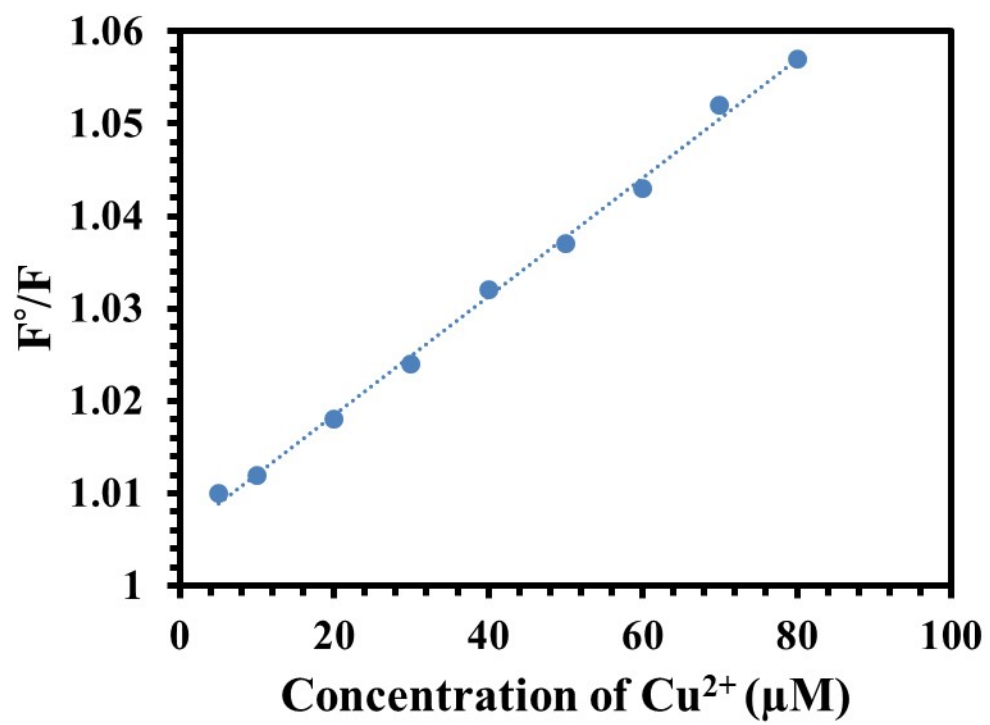

Fig.S13 Stern-Volmer plot between  $F^\circ/F$  vs. concentration of  $\text{Cu}^{2+}$ .



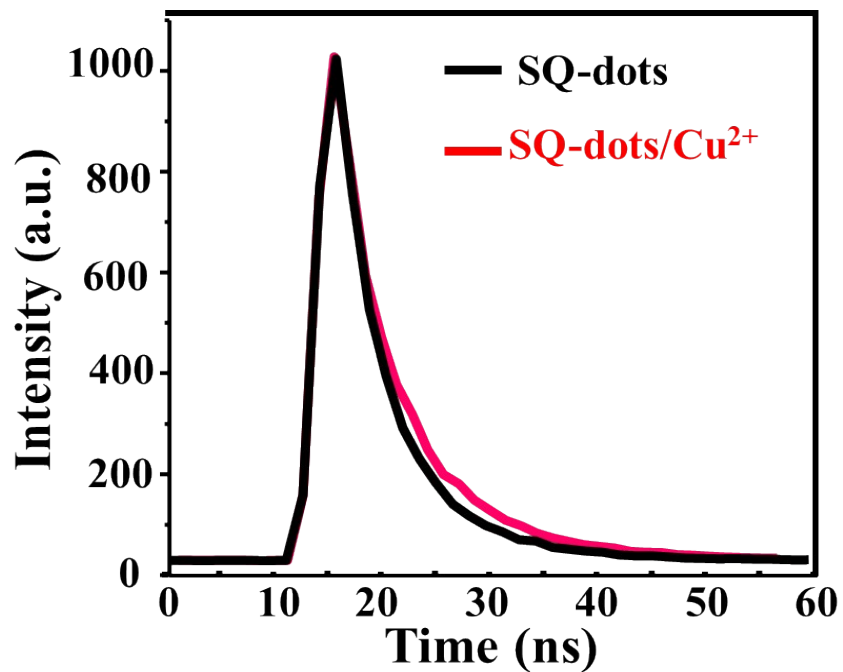

**Fig.S14** Time-resolved fluorescence decay curves of the as-fabricated SQ-dots and Cu<sup>2+</sup>-treated SQ-dots mixture.

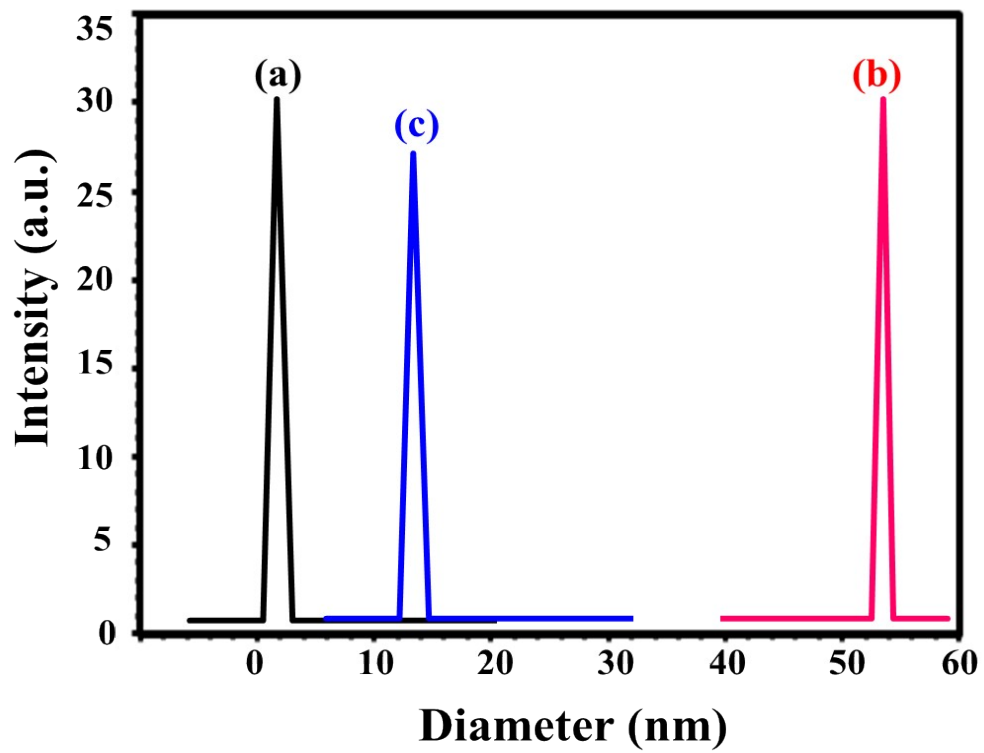

**Fig.S15** Hydrodynamic size distribution of: (a) SQ-dots; (b) SQ-dots+Cu<sup>2+</sup>; (c) SQ-dots/Cu<sup>2+</sup>+GSH.

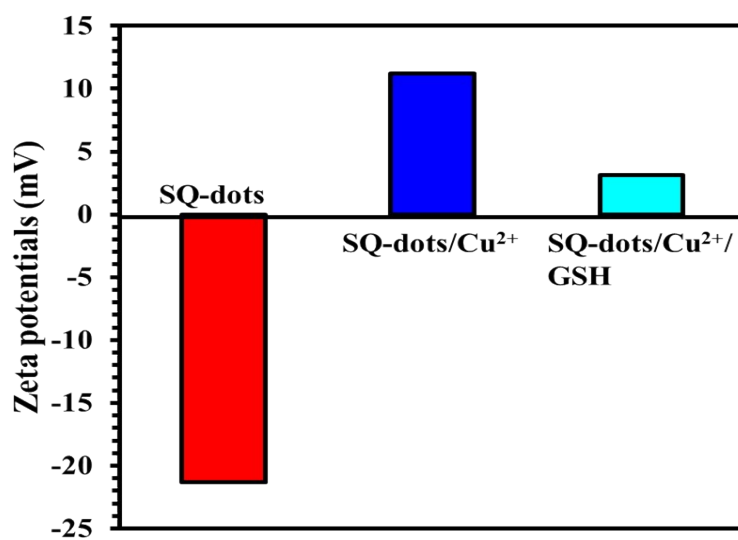

**Fig.S16** Zeta potentials of SQ-dots, the mixture of SQ-dots and Cu<sup>2+</sup>, and the mixture of SQ-dots and Cu<sup>2+</sup> in the presence of GSH.

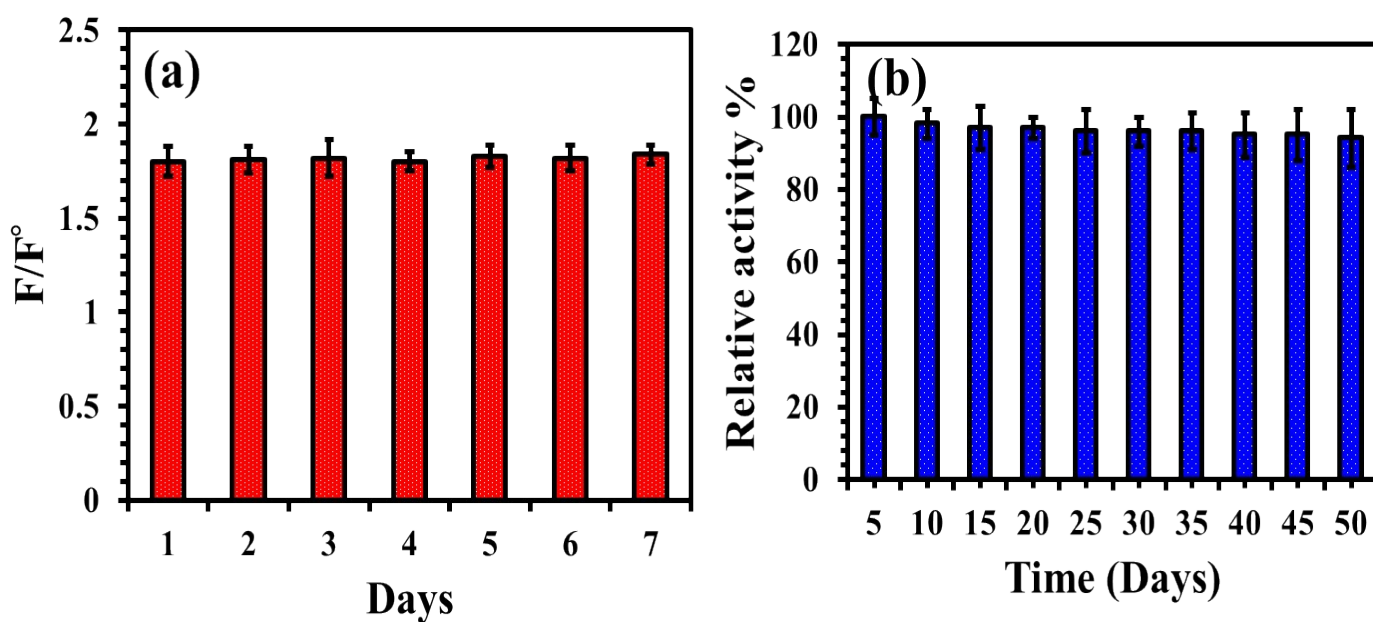

**Fig.S17** (a) Reproducibility of the as-fabricated SQ-dots towards 50  $\mu$ M GSH for seven days. (b) Relative activity % of the as-fabricated SQ-dots.
